# Supplementary material for: Smoking‐Induced M2‐TAMs, via circEML4 in EVs, Promote the Progression of NSCLC through ALKBH5‐Regulated m6A Modification of SOCS2 in NSCLC Cells
Source: PubMed Central journal article supplement (PMC10401136; doi:10.1002/advs.202300953), 2023-05-28
Supplement: ADVS-10-2300953-s001.pdf [file ADVS-10-2300953-s001.pdf]

## Supporting Information

for *Adv. Sci.*, DOI 10.1002/adv.202300953

Smoking-Induced M2-TAMs, via circEML4 in EVs, Promote the Progression of NSCLC through ALKBH5-Regulated m6A Modification of SOCS2 in NSCLC Cells

*Cheng Cheng, Peiwen Wang, Yi Yang, Xuan Du, Haibo Xia, Jinyuan Liu, Lu Lu, Hao Wu\* and Qizhan Liu\**

## Supplementary figures and figure legends

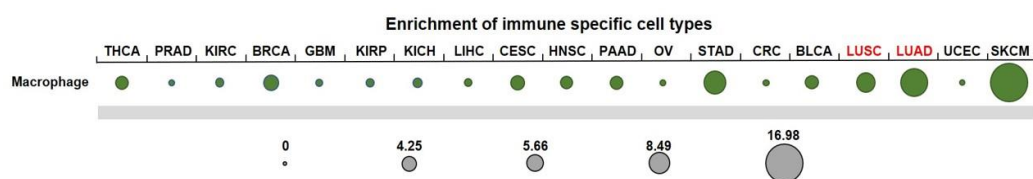

**Figure S1. Macrophage distribution in the TME evaluated using the Cancer Immunome Atlas (<https://tcia.at/>).** The results of the ssGSEA are presented by a bubble plot. Size of circles shows the size percentage of patients with NES > 0 and q value (FDR) < 0.1.

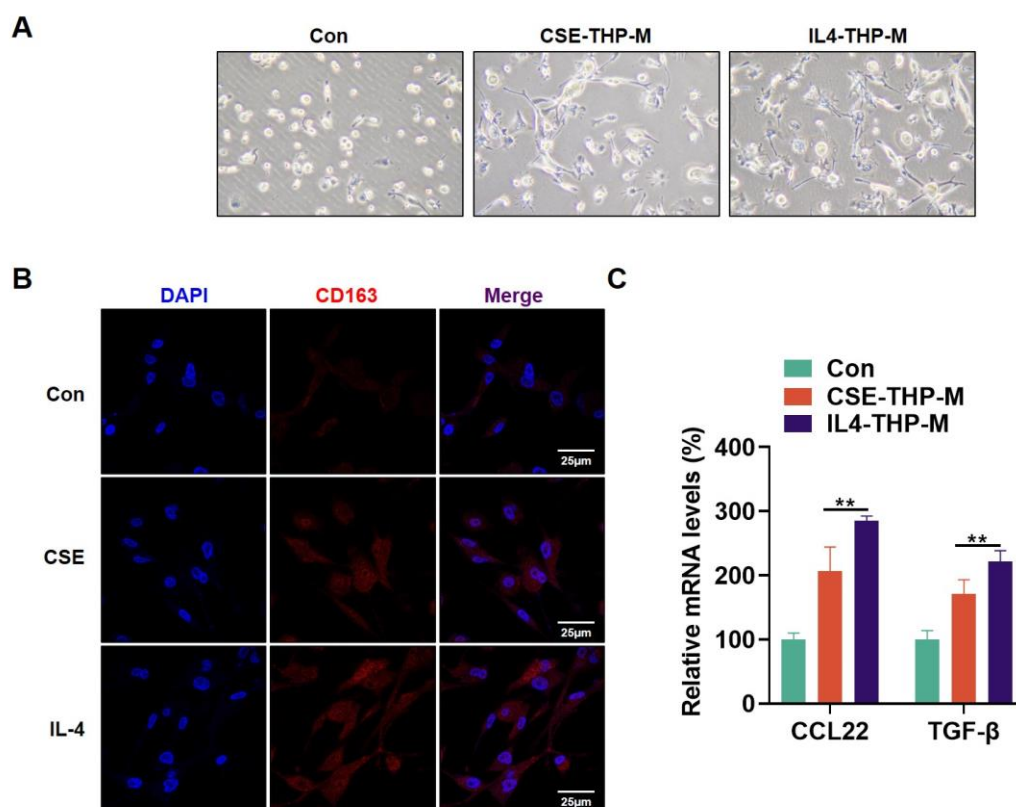

**Figure S2. CSE induces M2 polarization in THP-M.**

THP-M were exposed to 4% CSE for 48 h; IL-4 was used as a positive control. (A) THP-M treated with IL-4 and CSE showed morphological changes. (B) Representative images of CD163 immunofluorescence as determined by confocal microscopy for

THP-M. DAPI labels nuclei (blue). Scale bar, 25  $\mu$ m. (C) The mRNA levels of CCL22 and TGF- $\beta$  in THP-M were measured by qRT-PCR. Three independent experiments were conducted. All data represent means  $\pm$  SD. \* $P$  < 0.05; \*\* $P$  < 0.01.

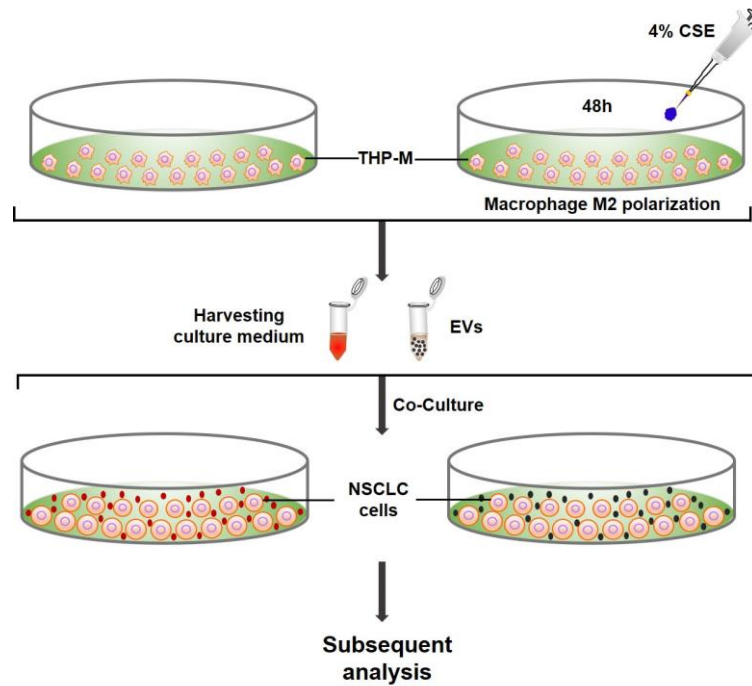

**Figure S3. Schematic description of the experimental design.**

CM or EVs from THP-M treated with CSE (4%) for 48 h. The NSCLC cells were treated with CM and EVs for 24 h. Cells were treated with CM or EVs every 3 days for the CCK8 and colony formation experiments.

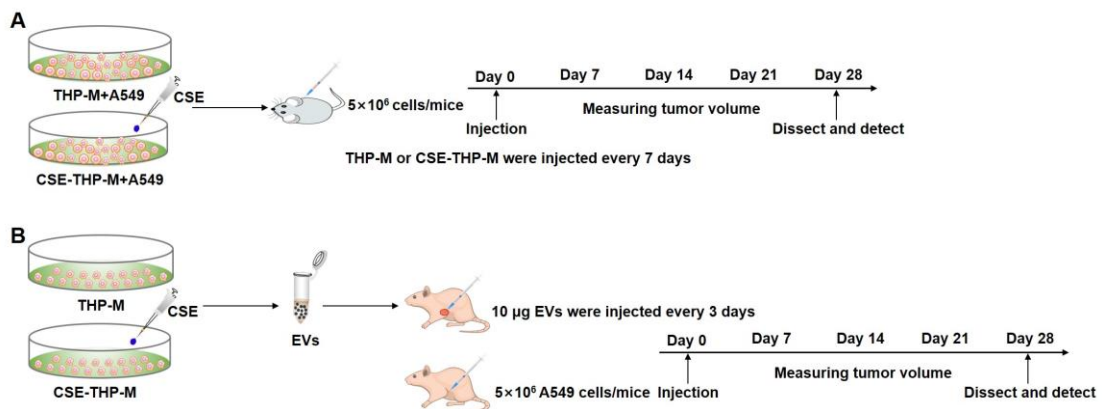

### Figure S4. Xenograft mice model.

THP-M were exposed to 4% CSE for 48 h. (A) Schematic illustration showing that THP-M or CSE-THP-M were mixed with A549 cells and injected into NOD/SCID mice. (B) EVs (10  $\mu$ g) were injected intratumorally every 3 days into the tumor centers of mice in each group (randomly divided).

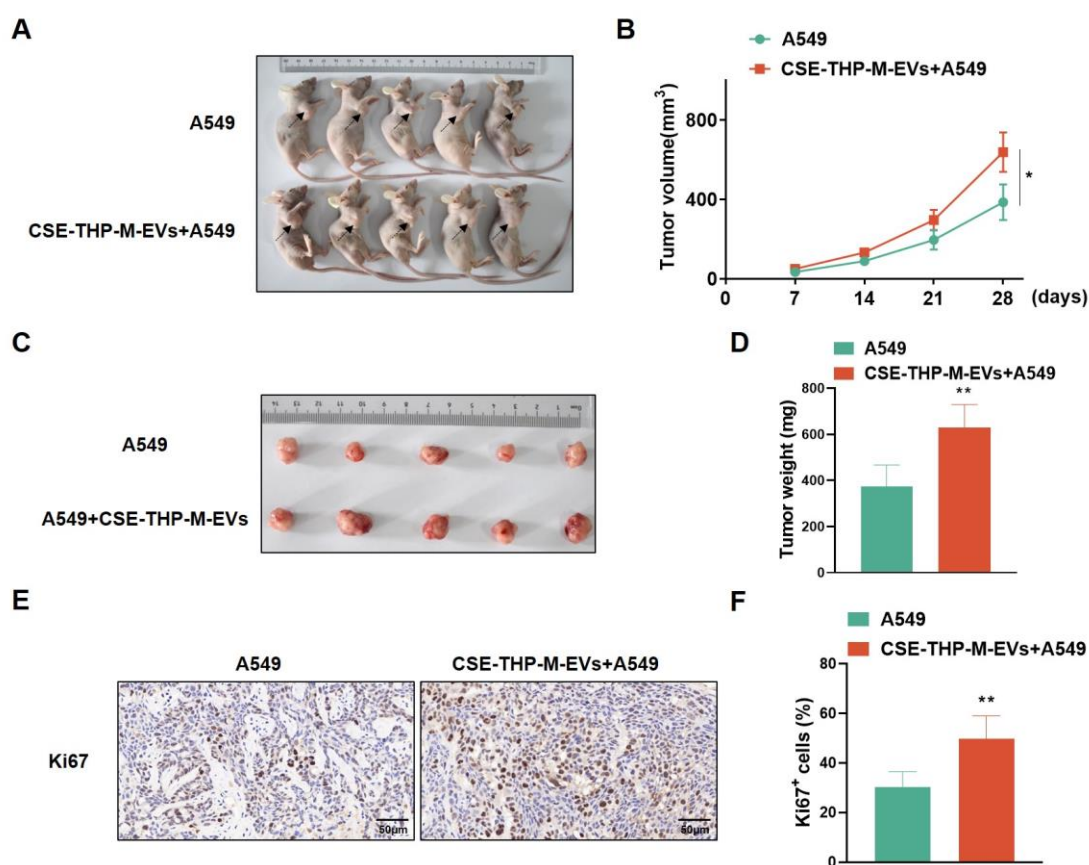

### Figure S5. The roles of EVs from CSE-THP-M on NSCLC cells *in vivo*

(A) Tumors of the subcutaneous layer were observed for two groups. (The arrows point to tumor xenografts.) (B) Tumor volume summary for mice, measured every 7 days. (C) Images of xenograft tumors harvested from nude mice. (D) Tumor weights (n = 5) were recorded. (E) IHC staining for Ki67 was assessed (n = 5), and (F) measurement of Ki67-positive signals in tumor tissues harvested from nude mice (n = 5 randomly selected fields per group). Scale bar, 50  $\mu$ m. Three independent experiments were

conducted. All data represent means  $\pm$  SD. \* $P < 0.05$ ; \*\* $P < 0.01$ .

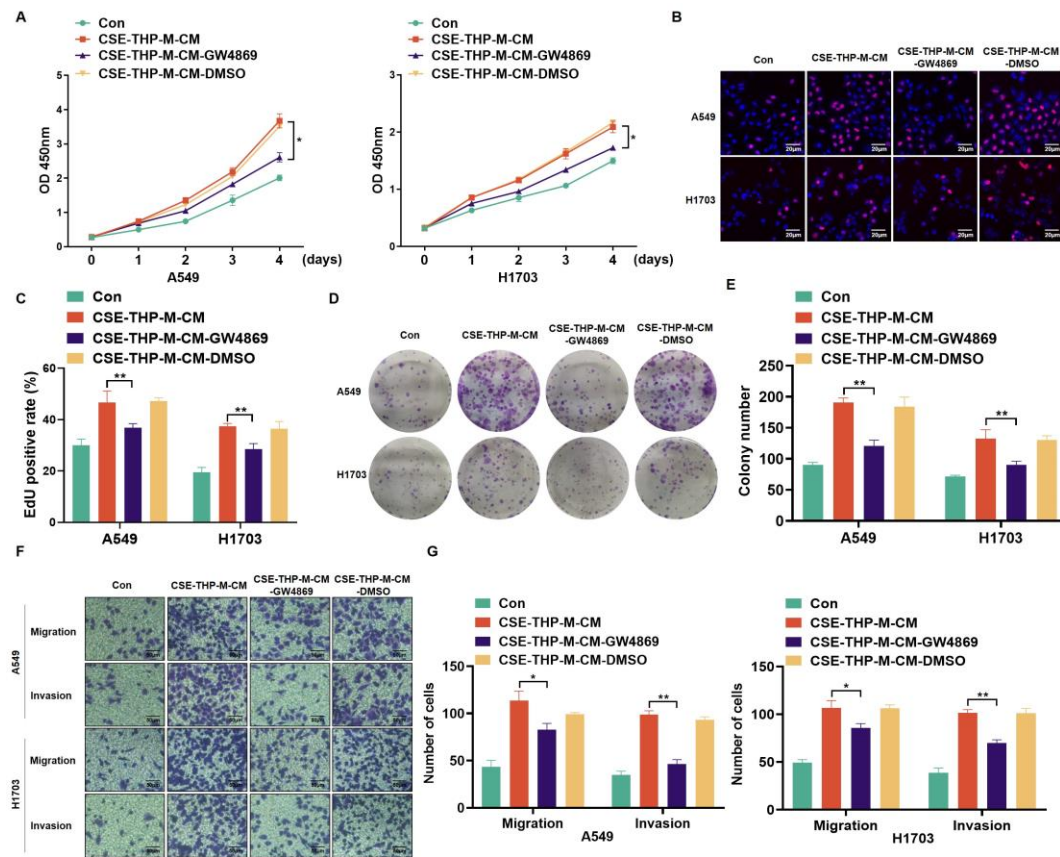

**Figure S6. Role of inhibition of secretion of EVs from CSE-induced M2 macrophages on proliferation, migration, and invasion of NSCLC cells.**

THP-M were exposed to 4% CSE for 48 h. The proliferation of A549 and H1703 cells was measured by (A) CCK-8 assays. (B) EdU assays and (C) EdU-positive rates were determined. (D) Colony formation assays were performed, and (E) colony formation assays were conducted for A549 and H1703 cells. (F) Representative images of Transwell assays, and (G) the migration and invasion were assessed for A549 and H1703 cells. Three independent experiments were conducted. All data represent means  $\pm$  SD. \* $P < 0.05$ ; \*\* $P < 0.01$ .

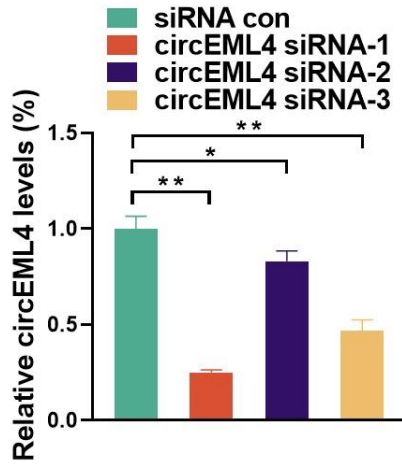

**Figure S7. Validation of circEML4 knockdown in THP-M.**

THP-M were exposed to siRNA con or to circEML4 siRNA for 24 h.

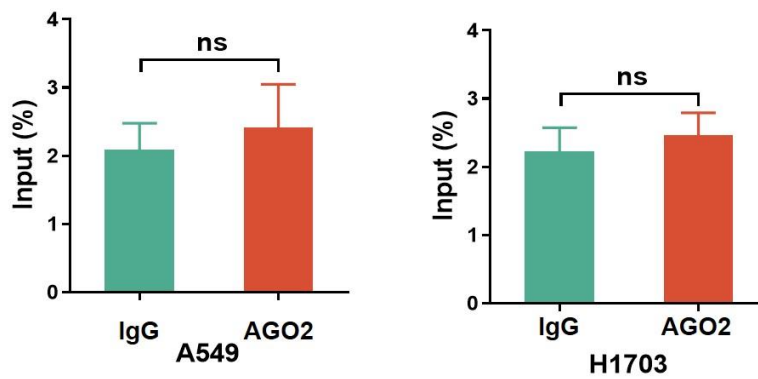

**Figure S8. The binding capacity of circEML4 to AGO2 in NSCLC cells was assessed.**

With extracts from A549 and H1703 cells, RIP experiments were performed with an antibody against AGO2. Three independent experiments were conducted. All data represent means  $\pm$  SD. ns, not significant. \* $P < 0.05$ ; \*\* $P < 0.01$ .

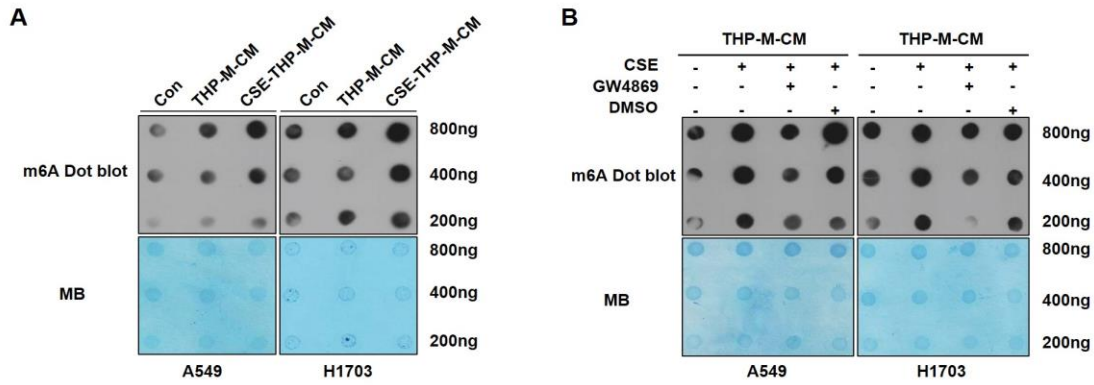

**Figure S9. The role of inhibition of EVs secretion from CSE-induced M2 macrophages on m6A contents of NSCLC cells.**

THP-M were exposed to 4% CSE for 48 h. A549 and H1703 cells were exposed to THP-M-CM or CSE-THP-M-CM for 24 h after GW4869 or DMSO co-incubation with THP-M. (A) and (B) RNA m6A dot blot assays were used to detect the m6A contents of total mRNA. Methylene blue staining was used to determine the loading control.

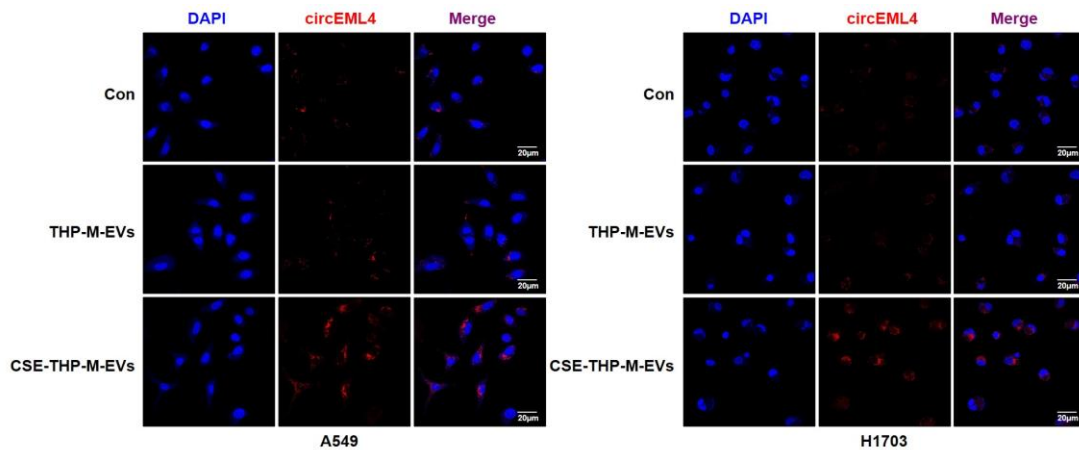

**Figure S10. The uptake of circEML4 in EVs from CSE-induced M2 macrophages by NSCLC cells is increased.**

THP-M were exposed to 4% CSE for 48 h. A549 and H1703 cells were exposed to THP-M-EVs or CSE-THP-M-EVs for 24 h. RNA fluorescence in situ hybridization for circEML4 (red) in A549 and H1703 cells. Nuclei were stained with DAPI (blue). Scale bar, 25  $\mu$ m.

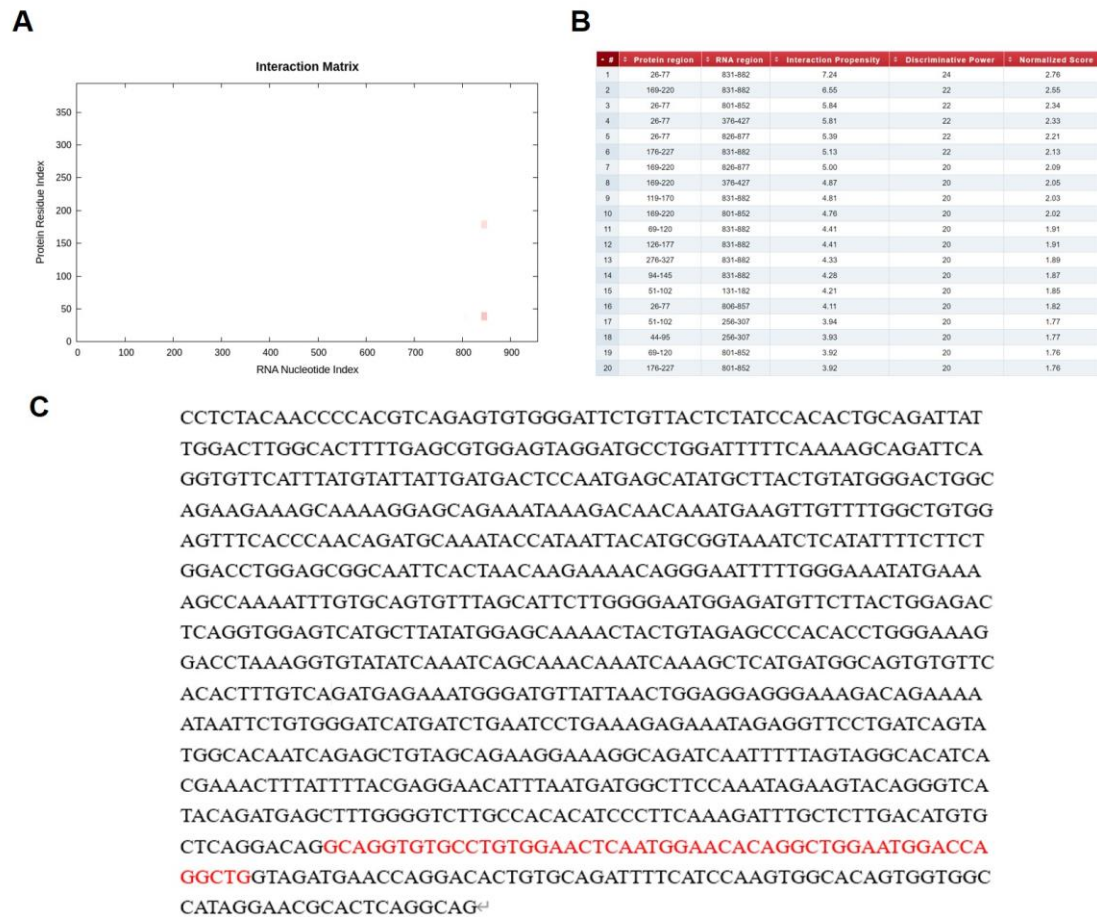

**Figure S11. Bioinformatics predicts the binding of circEML4 to ALKBH5 protein.**

(A) and (B) Binding sites between circEML4 and ALKBH5 predicted by the catRAPID website ([http://service.tartagliolab.com/page/catrapid\\_group](http://service.tartagliolab.com/page/catrapid_group)). (C) The sequence of mutated circEML4. The binding sequence of circEML4 with ALKBH5 (Red) was predicted by CatRAPID.



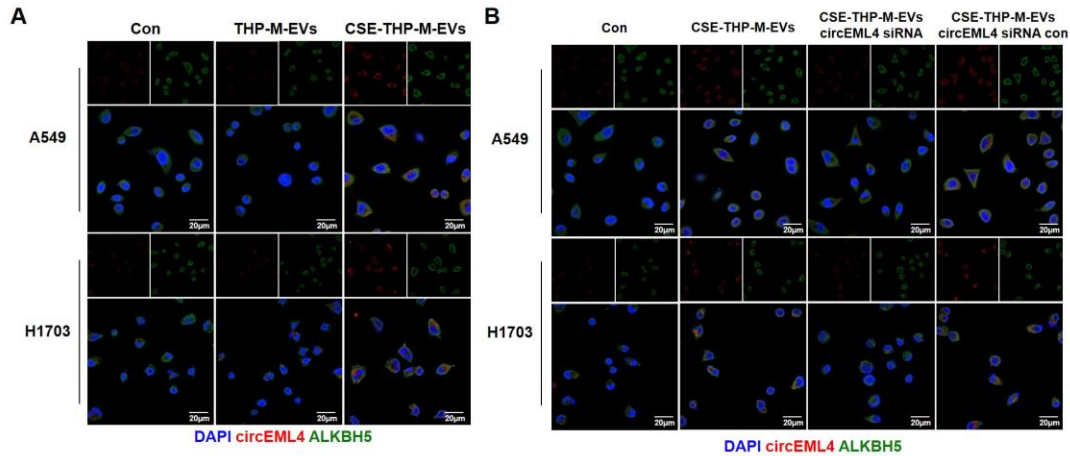

**Figure S12. The cellular localization of circEML4 and ALKBH5 in NSCLC cells.** CSE-THP-M were treated with circEML4 siRNA or siRNA con before co-incubation with A549 or H1703 cells. (A) and (B) Immunofluorescence evaluation of circEML4 (red) and ALKBH5 (green) co-localization in A549 and H1703 cells. Nuclei were stained with DAPI (blue). Scale bar, 20  $\mu\text{m}$ .

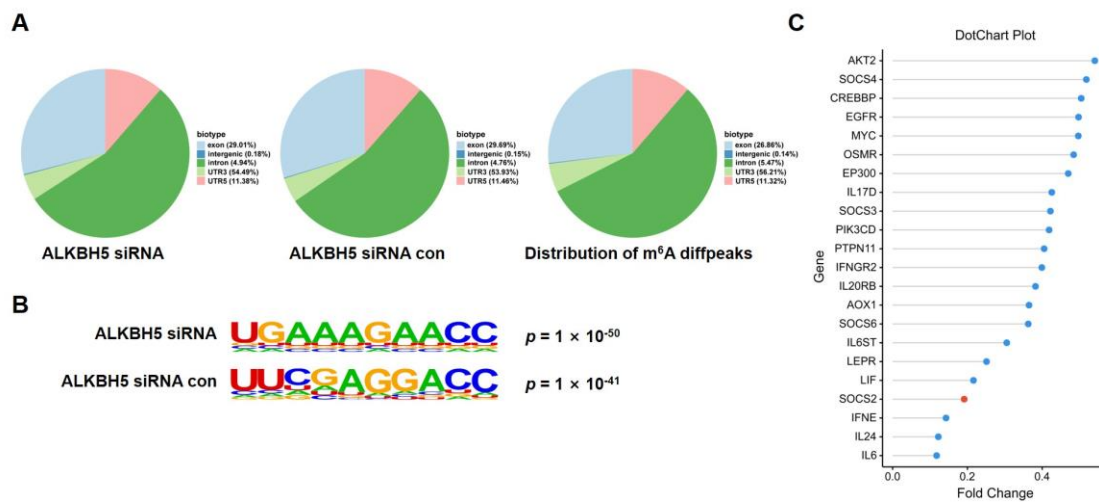

**Figure S13. Analysis of m<sup>6</sup>A-seq and RNA-seq of A549 cells.**

(A) Density distribution of m<sup>6</sup>A peaks across mRNA transcripts in A549 cells with or without ALKBH5 siRNA. (B) The predominant consensus motif was measured by m<sup>6</sup>A-seq. (C) Fold change of the JAK-STAT pathway by GSEA enrichment analysis at mRNA levels.

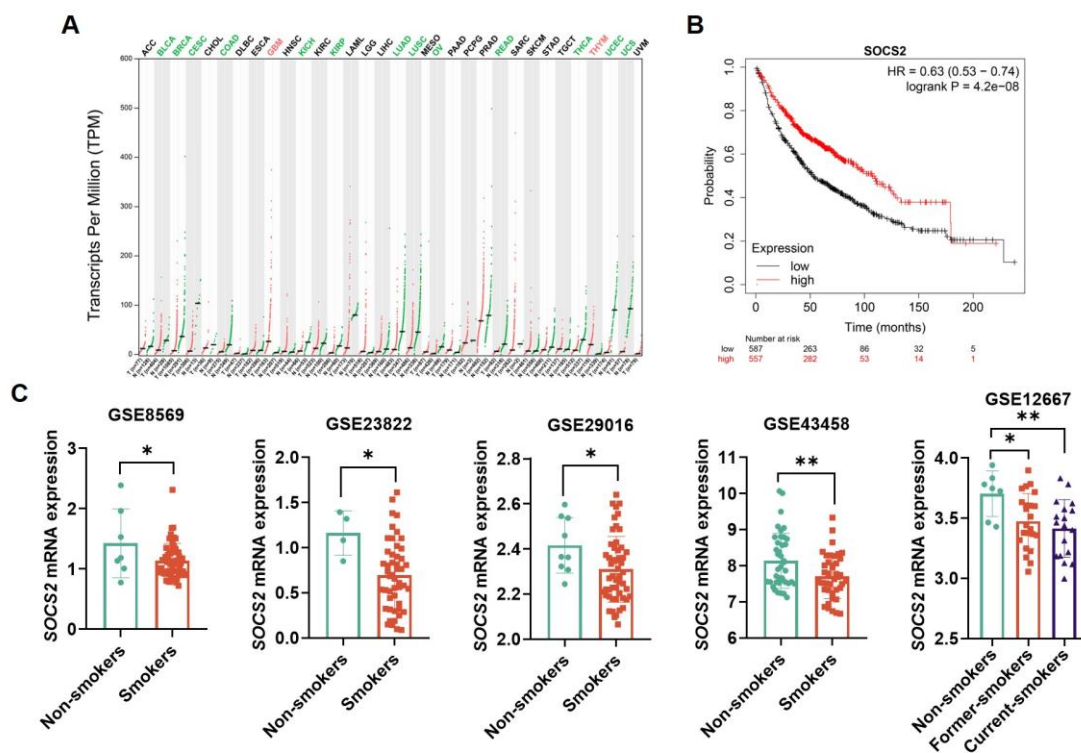

**Figure S14. Expression and prognostic value of SOCS2 in lung cancer.**

(A) Expression of SOCS2 in tumor and normal samples based on TCGA dataset. (B) Validation of the prognostic value of SOCS2 in lung cancer using the KM Plotter tool. (C) Expression of SOCS2 for smoking or never-smoking lung cancer patients based on the GEO dataset. Outliers were eliminated during the analysis. Z-score was used for

identifying outliers and calculated as follows:  $Z = \frac{x - \bar{x}}{\sigma}$ ,  $Z = \frac{x - \bar{x}}{\sigma}$  where  $x$  was the value to be normalized in the data,  $\bar{x}$  represented the mean of the data, and  $\sigma$  was the standard deviation of the data. Data were considered as an outlier if the Z-score was greater than or less than 2 or -2, respectively. All data represent means  $\pm$  SD. \* $P < 0.05$ ; \*\* $P < 0.01$ .

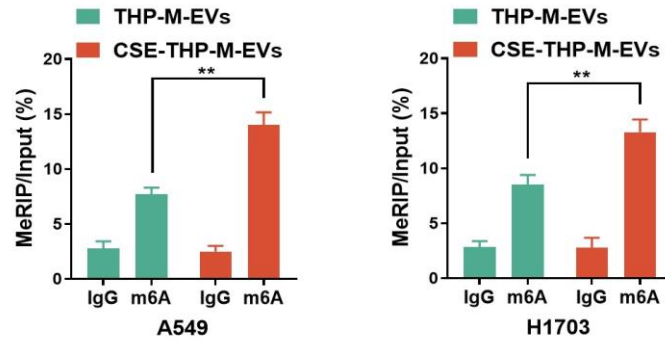

**Figure S15. Release of EVs derived from CSE-induced M2 macrophages increases m6A levels for SOCS2 in NSCLC cells.**

THP-M were exposed to 4% CSE for 48 h. A549 and H1703 cells were exposed to THP-M-EVs or CSE-THP-M-EVs for 24 h. MeRIP-qPCR determinations for m6A enrichment on SOCS2 in A549 and H1703 cells. Three independent experiments were conducted. All data represent mean  $\pm$  SD. \* $P < 0.05$ ; \*\* $P < 0.01$ .

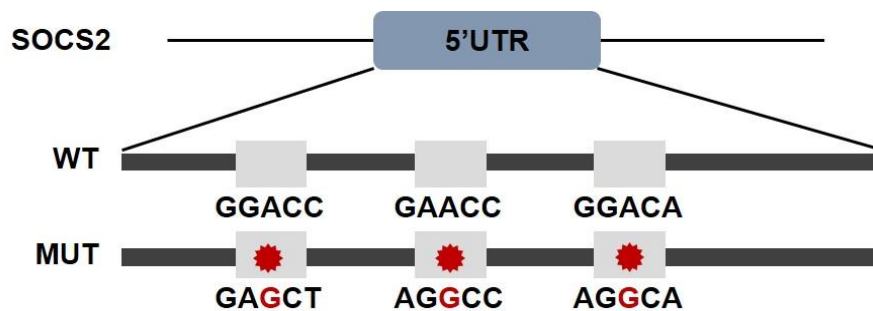

**Figure S16. Schematic depiction of mutations of the m6A site in SOCS2.**

The WT or m6A consensus sequence mutant SOCS2 5'UTR was fused with a firefly luciferase reporter. The m6A mutant sequence was constructed by replacing A with G.

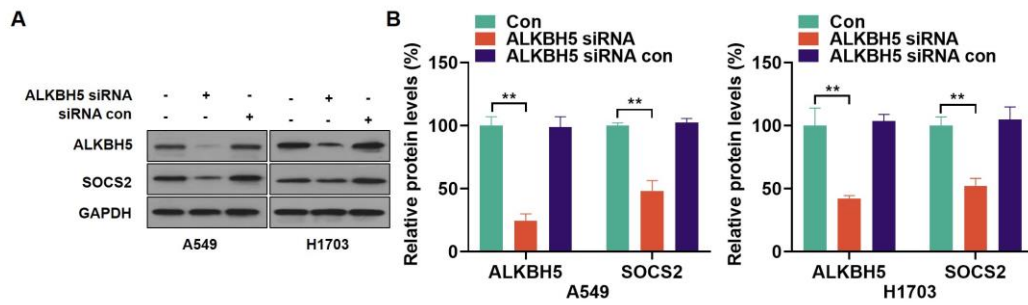

**Figure S17. Regulation of SOCS2 protein levels by ALKBH5.**

A549 and H1703 cells were treated with ALKBH5 siRNA or siRNA con for 24 h. (A) Western blots were performed, and (B) relative protein levels of ALKBH5 and SOCS2 were determined. Three independent experiments were conducted. All data represent means  $\pm$  SD. \* $P < 0.05$ ; \*\* $P < 0.01$ .

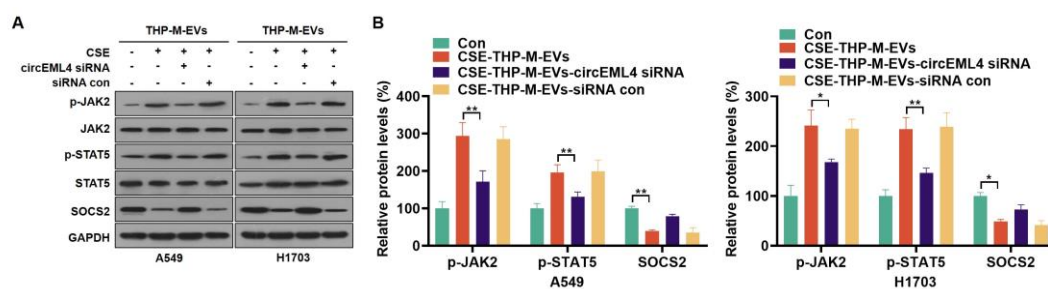

**Figure S18. circEML4 in EVs from CSE-induced M2 macrophages regulates the SOCS2/JAK-STAT pathway in NSCLC cells.**

THP-M were treated with circEML4 siRNA or siRNA con for 24 h, and then exposed to CSE (4%) for 48 h. A549 and H1703 cells were exposed to THP-M-EVs or CSE-THP-M-EVs for 24 h. (A) Western blots were performed, and (B) relative protein levels of p-JAK2, p-STAT5, and SOCS2 were determined. Three independent experiments were conducted. All data represent means  $\pm$  SD. \* $P < 0.05$ ; \*\* $P < 0.01$ .

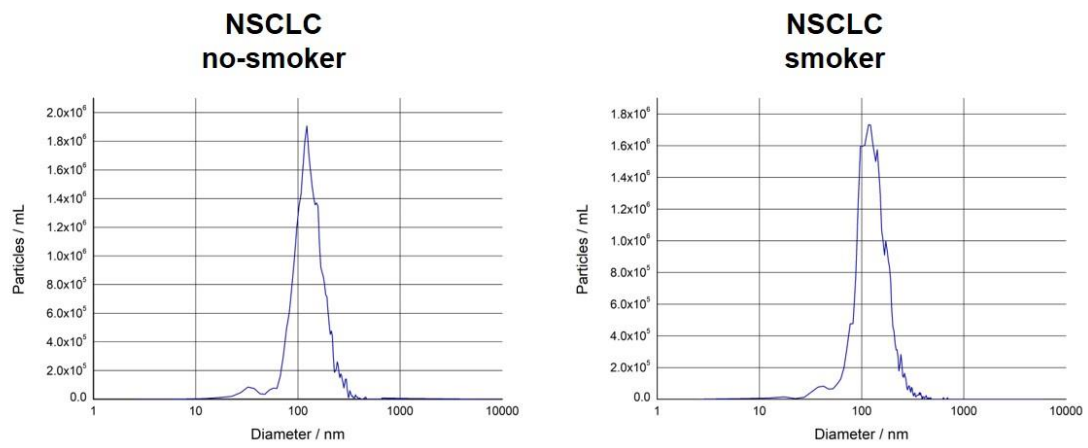

**Figure S19. Particle number and size analysis of EVs in plasma of NSCLC patients.**

## Supplementary tables

**Table S1. Clinical characteristics of NSCLC patients.**

| Characteristic              | Non-Smokers<br>(n=48) | Smokers<br>(n=70) | <i>P</i> value |
|-----------------------------|-----------------------|-------------------|----------------|
| Sex                         |                       |                   | 0.513          |
| Male, (%)                   | 28(58.3%)             | 45 (64.3%)        |                |
| Female, (%)                 | 20 (41.7%)            | 25 (35.7%)        |                |
| Age(years), Mean $\pm$ SD   | 60.0 $\pm$ 11.6       | 62.1 $\pm$ 7.9    | 0.263          |
| Package year, Mean $\pm$ SD |                       | 40.6 $\pm$ 24.0   | NA             |
| Histology type              |                       |                   |                |
| adenocarcinoma              | 24 (50.0%)            | 27 (38.6 %)       | 0.354          |
| squamous carcinoma          | 22 (45.8%)            | 36 (51.4%)        |                |
| others                      | 2 (4.2%)              | 7 (10.0%)         |                |
| Tumor grade                 |                       |                   |                |
| T1                          | 40 (83.3%)            | 35 (50.0%)        | <0.001         |
| T2-T4                       | 8 (16.7%)             | 35 (50.0%)        |                |
| Lymphatic metastasis        |                       |                   |                |
| negative                    | 29 (60.4%)            | 25(35.7%)         | 0.008          |
| positive                    | 19 (39.6%)            | 45 (64.3%)        |                |
| Distant metastasis          |                       |                   |                |
| no                          | 40 (83.3%)            | 49 (70.0%)        | 0.098          |
| yes                         | 8 (16.7%)             | 21 (30.0%)        |                |
| TNM stage                   |                       |                   |                |
| 0-II                        | 39 (81.2%)            | 37 (52.9%)        | 0.002          |
| III-IV                      | 9 (18.8%)             | 33 (47.1%)        |                |
| Maximum tumor diameter      |                       |                   | <0.001         |
| $\leq$ 3cm                  | 45 (93.8%)            | 44 (62.9%)        |                |
| >3cm                        | 3 (6.2%)              | 26 (37.1%)        |                |

*P* < 0.05 was considered statistically significant.

**Table S2. 13 common up-regulated circRNAs obtained from GSE112214 and GSE158695**

| probeID     | Annotations        |                  |                           |        |             | GSE112214 |         | GSE158695 |         |
|-------------|--------------------|------------------|---------------------------|--------|-------------|-----------|---------|-----------|---------|
|             | CircRNA            | Alias            | Position                  | Strand | Gene Symbol | FC        | P-value | FC        | P-value |
| ASCRP003393 | hsa_circRNA_103089 | hsa_circ_0008253 | chr20: 50342357-50346517  | -      | ATP9A       | 1.870     | <0.001  | 6.296     | 0.007   |
| ASCRP000991 | hsa_circRNA_100616 | hsa_circ_0004606 | chr10: 72462067-72468534  | +      | ADAMTS14    | 1.583     | 0.001   | 2.200     | 0.014   |
| ASCRP000922 | hsa_circRNA_100542 | hsa_circ_0017639 | chr10: 7290509-7327916    | -      | SFMBT2      | 1.954     | 0.001   | 5.563     | 0.034   |
| ASCRP003014 | hsa_circRNA_102702 | hsa_circ_0054243 | chr2: 42513408-42531691   | +      | EML4        | 1.670     | 0.001   | 1.562     | 0.007   |
| ASCRP000874 | hsa_circRNA_100491 | hsa_circ_0003314 | chr1: 233353644-233363117 | -      | PCNXL2      | 1.584     | 0.001   | 1.984     | 0.010   |
| ASCRP004411 | hsa_circRNA_104138 | hsa_circ_0077086 | chr6: 76357446-76380436   | +      | SENP6       | 1.680     | 0.005   | 2.102     | 0.013   |
| ASCRP002200 | hsa_circRNA_101857 | hsa_circ_0040148 | chr16: 70178323-70180131  | +      | PDPR        | 1.830     | 0.007   | 1.589     | 0.004   |
| ASCRP002347 | hsa_circRNA_102011 | hsa_circ_0042521 | chr17: 26512204-26512291  | +      | NLK         | 1.809     | 0.017   | 1.505     | 0.012   |
| ASCRP001824 | hsa_circRNA_101473 | hsa_circ_0034447 | chr15: 39876188-39876388  | +      | THBS1       | 1.730     | 0.019   | 2.369     | 0.003   |
| ASCRP004150 | hsa_circRNA_103862 | hsa_circ_0072758 | chr5: 68467096-68470236   | +      | CCNB1       | 1.622     | 0.021   | 2.688     | 0.008   |
| ASCRP003427 | hsa_circRNA_103123 | hsa_circ_0002360 | chr21: 36206706-36231875  | -      | RUNX1       | 2.143     | 0.023   | 2.472     | 0.006   |
| ASCRP003013 | hsa_circRNA_102701 | hsa_circ_0054241 | chr2: 42513408-42515462   | +      | EML4        | 1.514     | 0.026   | 1.785     | 0.021   |
| ASCRP004228 | hsa_circRNA_103948 | hsa_circ_0003528 | chr5: 134032815-134044578 | +      | SEC24A      | 1.633     | 0.037   | 1.878     | 0.002   |

Condition pairs: Tumorous tissue vs Nontumorous tissue

probeID: Represents probe name.

P-value: Calculated from paired t-test.

Annotations: Include circRNA, Alias, Position, strand, and GeneSymbol.

**Table S3. List of top 10 candidates of circEML4-binding proteins that were identified by RNA pull-down and MS.**

| Accession | Gene Name | MW (kDa) | Unique Peptides | Coverage (%) |
|-----------|-----------|----------|-----------------|--------------|
| Q6P6C2    | ALKBH5    | 44.2     | 20              | 54.1         |
| Q96DH6    | MSI2      | 35.2     | 5               | 21.3         |
| P61923    | COPZ1     | 20.2     | 5               | 32.8         |
| P63173    | RPL38     | 8.2      | 5               | 47.1         |
| P46783    | RPS10     | 18.9     | 5               | 29.1         |
| Q9Y5K5    | UCHL5     | 37.6     | 5               | 17.3         |
| Q2TB90    | HKDC1     | 102.5    | 4               | 6.2          |
| P63241    | EIF5A     | 16.8     | 4               | 18.8         |
| Q01105    | SET       | 33.5     | 4               | 16.6         |
| O95819    | MAP4K4    | 142.0    | 4               | 5.9          |



**Table S4. GSEA enrichment analysis at m6A levels**

| <b>ID</b> | <b>Description</b>                                       | <b>Set size</b> | <b>Enrichment score</b> | <b>NES</b> | <b>P-value</b> | <b>P.adjust</b> | <b>q-value</b> |
|-----------|----------------------------------------------------------|-----------------|-------------------------|------------|----------------|-----------------|----------------|
| hsa00650  | Butanoate metabolism                                     | 10              | 0.719                   | 1.662      | 0.009          | 0.031           | 0.018          |
| hsa00770  | Pantothenate and CoA biosynthesis                        | 11              | 0.701                   | 1.683      | 0.005          | 0.023           | 0.013          |
| hsa05150  | Staphylococcus aureus infection                          | 13              | 0.683                   | 1.739      | 0.006          | 0.025           | 0.014          |
| hsa00982  | Drug metabolism - cytochrome P450                        | 11              | 0.681                   | 1.634      | 0.011          | 0.034           | 0.020          |
| hsa00051  | Fructose and mannose metabolism                          | 18              | 0.651                   | 1.818      | 0.003          | 0.014           | 0.008          |
| hsa05032  | Morphine addiction                                       | 33              | 0.633                   | 2.059      | <0.001         | 0.001           | 0.001          |
| hsa04727  | GABAergic synapse                                        | 31              | 0.607                   | 1.958      | <0.001         | 0.004           | 0.002          |
| hsa04610  | Complement and coagulation cascades                      | 28              | 0.584                   | 1.814      | 0.002          | 0.012           | 0.007          |
| hsa04974  | Protein digestion and absorption                         | 29              | 0.576                   | 1.822      | 0.003          | 0.015           | 0.008          |
| hsa01521  | EGFR tyrosine kinase inhibitor resistance                | 53              | 0.572                   | 2.064      | <0.001         | 0.001           | <0.001         |
| hsa03020  | RNA polymerase                                           | 22              | 0.572                   | 1.693      | 0.007          | 0.028           | 0.016          |
| hsa04724  | Glutamatergic synapse                                    | 43              | 0.571                   | 1.959      | <0.001         | 0.003           | 0.002          |
| hsa00970  | Aminoacyl-tRNA biosynthesis                              | 29              | 0.570                   | 1.803      | 0.003          | 0.017           | 0.010          |
| hsa04726  | Serotonergic synapse                                     | 36              | 0.565                   | 1.870      | 0.001          | 0.008           | 0.005          |
| hsa04934  | Cushing syndrome                                         | 67              | 0.564                   | 2.119      | <0.001         | <0.001          | <0.001         |
| hsa05219  | Bladder cancer                                           | 30              | 0.563                   | 1.804      | 0.002          | 0.012           | 0.007          |
| hsa04540  | Gap junction                                             | 45              | 0.548                   | 1.904      | <0.001         | 0.004           | 0.002          |
| hsa02010  | ABC transporters                                         | 22              | 0.546                   | 1.615      | 0.016          | 0.045           | 0.026          |
| hsa04916  | Melanogenesis                                            | 43              | 0.542                   | 1.862      | 0.001          | 0.008           | 0.005          |
| hsa04550  | Signaling pathways regulating pluripotency of stem cells | 74              | 0.538                   | 2.054      | <0.001         | <0.001          | <0.001         |
| hsa04623  | Cytosolic DNA-sensing pathway                            | 30              | 0.537                   | 1.722      | 0.005          | 0.021           | 0.012          |
| hsa03440  | Homologous recombination                                 | 31              | 0.531                   | 1.714      | 0.006          | 0.025           | 0.014          |
| hsa04371  | Apelin signaling pathway                                 | 74              | 0.530                   | 2.024      | <0.001         | <0.001          | <0.001         |
| hsa05226  | Gastric cancer                                           | 76              | 0.529                   | 2.045      | <0.001         | <0.001          | <0.001         |
| hsa04370  | VEGF signaling pathway                                   | 39              | 0.529                   | 1.781      | 0.003          | 0.016           | 0.009          |
| hsa05225  | Hepatocellular carcinoma                                 | 103             | 0.526                   | 2.103      | <0.001         | <0.001          | <0.001         |
| hsa04072  | Phospholipase D signaling pathway                        | 80              | 0.525                   | 2.046      | <0.001         | <0.001          | <0.001         |
| hsa05205  | Proteoglycans in cancer                                  | 133             | 0.520                   | 2.170      | <0.001         | <0.001          | <0.001         |

|          |                                                |     |       |       |        |        |        |
|----------|------------------------------------------------|-----|-------|-------|--------|--------|--------|
| hsa05224 | Breast cancer                                  | 75  | 0.518 | 1.994 | <0.001 | 0.001  | <0.001 |
| hsa05217 | Basal cell carcinoma                           | 31  | 0.516 | 1.667 | 0.010  | 0.033  | 0.019  |
| hsa00280 | Valine, leucine and isoleucine degradation     | 29  | 0.515 | 1.629 | 0.018  | 0.050  | 0.029  |
| hsa05223 | Non-small cell lung cancer                     | 50  | 0.511 | 1.827 | 0.001  | 0.008  | 0.005  |
| hsa05206 | MicroRNAs in cancer                            | 104 | 0.509 | 2.039 | <0.001 | <0.001 | <0.001 |
| hsa04725 | Cholinergic synapse                            | 49  | 0.508 | 1.801 | 0.002  | 0.012  | 0.007  |
| hsa05221 | Acute myeloid leukemia                         | 37  | 0.504 | 1.683 | 0.009  | 0.031  | 0.018  |
| hsa04713 | Circadian entrainment                          | 38  | 0.503 | 1.693 | 0.005  | 0.020  | 0.012  |
| hsa04012 | ErbB signaling pathway                         | 62  | 0.501 | 1.861 | 0.001  | 0.006  | 0.003  |
| hsa04730 | Long-term depression                           | 30  | 0.501 | 1.606 | 0.013  | 0.040  | 0.023  |
| hsa04662 | B cell receptor signaling pathway              | 38  | 0.497 | 1.672 | 0.006  | 0.024  | 0.014  |
| hsa00310 | Lysine degradation                             | 40  | 0.494 | 1.671 | 0.006  | 0.024  | 0.014  |
| hsa04014 | Ras signaling pathway                          | 114 | 0.492 | 2.011 | <0.001 | <0.001 | <0.001 |
| hsa04146 | Peroxisome                                     | 45  | 0.489 | 1.701 | 0.003  | 0.017  | 0.010  |
| hsa04115 | p53 signaling pathway                          | 46  | 0.485 | 1.701 | 0.004  | 0.020  | 0.012  |
| hsa05231 | Choline metabolism in cancer                   | 63  | 0.484 | 1.800 | 0.001  | 0.006  | 0.004  |
| hsa04935 | Growth hormone synthesis, secretion and action | 70  | 0.482 | 1.831 | <0.001 | 0.003  | 0.002  |
| hsa04919 | Thyroid hormone signaling pathway              | 75  | 0.480 | 1.848 | <0.001 | 0.004  | 0.002  |
| hsa04917 | Prolactin signaling pathway                    | 40  | 0.479 | 1.619 | 0.011  | 0.034  | 0.020  |
| hsa04915 | Estrogen signaling pathway                     | 67  | 0.475 | 1.784 | 0.001  | 0.006  | 0.004  |
| hsa05214 | Glioma                                         | 50  | 0.473 | 1.691 | 0.005  | 0.020  | 0.012  |
| hsa04613 | Neutrophil extracellular trap formation        | 75  | 0.472 | 1.816 | 0.001  | 0.006  | 0.004  |
| hsa04611 | Platelet activation                            | 65  | 0.472 | 1.766 | 0.001  | 0.008  | 0.005  |
| hsa04150 | mTOR signaling pathway                         | 101 | 0.468 | 1.859 | <0.001 | 0.001  | 0.001  |
| hsa04062 | Chemokine signaling pathway                    | 79  | 0.465 | 1.806 | <0.001 | 0.005  | 0.003  |
| hsa04912 | GnRH signaling pathway                         | 56  | 0.461 | 1.667 | 0.004  | 0.018  | 0.010  |
| hsa05215 | Prostate cancer                                | 60  | 0.458 | 1.679 | 0.003  | 0.017  | 0.010  |
| hsa00230 | Purine metabolism                              | 58  | 0.457 | 1.660 | 0.005  | 0.023  | 0.013  |
| hsa04310 | Wnt signaling pathway                          | 86  | 0.448 | 1.749 | <0.001 | 0.005  | 0.003  |
| hsa01522 | Endocrine resistance                           | 60  | 0.442 | 1.620 | 0.008  | 0.030  | 0.017  |

|          |                                                      |     |       |       |        |        |        |
|----------|------------------------------------------------------|-----|-------|-------|--------|--------|--------|
| hsa05034 | Alcoholism                                           | 71  | 0.441 | 1.678 | 0.003  | 0.016  | 0.009  |
| hsa04064 | NF-kappa B signaling pathway                         | 59  | 0.440 | 1.602 | 0.007  | 0.028  | 0.016  |
| hsa04928 | Parathyroid hormone synthesis, secretion and action  | 60  | 0.437 | 1.600 | 0.010  | 0.034  | 0.019  |
| hsa04070 | Phosphatidylinositol signaling system                | 64  | 0.436 | 1.621 | 0.002  | 0.014  | 0.008  |
| hsa05212 | Pancreatic cancer                                    | 52  | 0.434 | 1.568 | 0.012  | 0.037  | 0.021  |
| hsa05211 | Renal cell carcinoma                                 | 51  | 0.433 | 1.555 | 0.014  | 0.043  | 0.025  |
| hsa04926 | Relaxin signaling pathway                            | 75  | 0.433 | 1.664 | 0.005  | 0.020  | 0.012  |
| hsa05167 | Kaposi sarcoma-associated herpesvirus infection      | 108 | 0.432 | 1.753 | <0.001 | 0.004  | 0.002  |
| hsa04066 | HIF-1 signaling pathway                              | 63  | 0.431 | 1.603 | 0.009  | 0.031  | 0.018  |
| hsa04728 | Dopaminergic synapse                                 | 71  | 0.431 | 1.641 | 0.004  | 0.019  | 0.011  |
| hsa05210 | Colorectal cancer                                    | 63  | 0.427 | 1.588 | 0.010  | 0.033  | 0.019  |
| hsa05132 | Salmonella infection                                 | 157 | 0.426 | 1.816 | <0.001 | <0.001 | <0.001 |
| hsa04020 | Calcium signaling pathway                            | 78  | 0.426 | 1.647 | 0.006  | 0.024  | 0.014  |
| hsa04024 | cAMP signaling pathway                               | 87  | 0.425 | 1.667 | 0.002  | 0.012  | 0.007  |
| hsa05200 | Pathways in cancer                                   | 285 | 0.425 | 1.927 | <0.001 | <0.001 | <0.001 |
| hsa01240 | Biosynthesis of cofactors                            | 83  | 0.425 | 1.655 | 0.002  | 0.012  | 0.007  |
| hsa04068 | FoxO signaling pathway                               | 90  | 0.424 | 1.671 | 0.001  | 0.008  | 0.005  |
| hsa04210 | Apoptosis                                            | 92  | 0.423 | 1.658 | 0.004  | 0.018  | 0.010  |
| hsa04010 | MAPK signaling pathway                               | 170 | 0.423 | 1.816 | <0.001 | <0.001 | <0.001 |
| hsa03015 | mRNA surveillance pathway                            | 63  | 0.418 | 1.555 | 0.015  | 0.043  | 0.025  |
| hsa04625 | C-type lectin receptor signaling pathway             | 65  | 0.417 | 1.561 | 0.009  | 0.031  | 0.018  |
| hsa05202 | Transcriptional misregulation in cancer              | 100 | 0.417 | 1.651 | 0.001  | 0.009  | 0.005  |
| hsa04722 | Neurotrophin signaling pathway                       | 73  | 0.416 | 1.586 | 0.010  | 0.033  | 0.019  |
| hsa05207 | Chemical carcinogenesis - receptor activation        | 90  | 0.415 | 1.634 | 0.002  | 0.011  | 0.006  |
| hsa04933 | AGE-RAGE signaling pathway in diabetic complications | 64  | 0.409 | 1.520 | 0.009  | 0.031  | 0.018  |
| hsa05169 | Epstein-Barr virus infection                         | 111 | 0.406 | 1.657 | 0.003  | 0.015  | 0.009  |
| hsa05163 | Human cytomegalovirus infection                      | 128 | 0.406 | 1.692 | <0.001 | 0.005  | 0.003  |
| hsa05010 | Alzheimer disease                                    | 209 | 0.405 | 1.778 | <0.001 | <0.001 | <0.001 |
| hsa05131 | Shigellosis                                          | 161 | 0.405 | 1.731 | <0.001 | 0.001  | 0.001  |
| hsa04630 | JAK-STAT signaling pathway                           | 71  | 0.401 | 1.526 | 0.015  | 0.043  | 0.025  |

|          |                                                   |     |       |       |        |       |       |
|----------|---------------------------------------------------|-----|-------|-------|--------|-------|-------|
| hsa05170 | Human immunodeficiency virus 1 infection          | 127 | 0.397 | 1.654 | 0.002  | 0.012 | 0.007 |
| hsa03013 | Nucleocytoplasmic transport                       | 77  | 0.397 | 1.532 | 0.016  | 0.046 | 0.027 |
| hsa05161 | Hepatitis B                                       | 109 | 0.395 | 1.602 | 0.004  | 0.017 | 0.010 |
| hsa05012 | Parkinson disease                                 | 140 | 0.393 | 1.648 | 0.001  | 0.006 | 0.003 |
| hsa05152 | Tuberculosis                                      | 85  | 0.388 | 1.523 | 0.009  | 0.031 | 0.018 |
| hsa04152 | AMPK signaling pathway                            | 83  | 0.388 | 1.514 | 0.013  | 0.040 | 0.023 |
| hsa04015 | Rap1 signaling pathway                            | 113 | 0.386 | 1.578 | 0.002  | 0.014 | 0.008 |
| hsa04140 | Autophagy - animal                                | 101 | 0.384 | 1.527 | 0.008  | 0.031 | 0.018 |
| hsa05165 | Human papillomavirus infection                    | 188 | 0.383 | 1.664 | <0.001 | 0.002 | 0.001 |
| hsa05171 | Coronavirus disease - COVID-19                    | 129 | 0.378 | 1.573 | 0.002  | 0.012 | 0.007 |
| hsa05166 | Human T-cell leukemia virus 1 infection           | 133 | 0.374 | 1.561 | 0.003  | 0.017 | 0.010 |
| hsa04142 | Lysosome                                          | 86  | 0.374 | 1.460 | 0.011  | 0.036 | 0.021 |
| hsa05208 | Chemical carcinogenesis - reactive oxygen species | 120 | 0.367 | 1.515 | 0.009  | 0.031 | 0.018 |
| hsa04218 | Cellular senescence                               | 109 | 0.364 | 1.479 | 0.013  | 0.040 | 0.023 |
| hsa04360 | Axon guidance                                     | 100 | 0.362 | 1.433 | 0.017  | 0.048 | 0.028 |
| hsa04144 | Endocytosis                                       | 177 | 0.355 | 1.531 | 0.002  | 0.012 | 0.007 |
| hsa04141 | Protein processing in endoplasmic reticulum       | 120 | 0.353 | 1.460 | 0.015  | 0.044 | 0.025 |
| hsa05168 | Herpes simplex virus 1 infection                  | 273 | 0.350 | 1.581 | <0.001 | 0.002 | 0.001 |
| hsa04151 | PI3K-Akt signaling pathway                        | 177 | 0.337 | 1.453 | 0.007  | 0.026 | 0.015 |
| hsa05022 | Pathways of neurodegeneration - multiple diseases | 246 | 0.329 | 1.472 | 0.001  | 0.008 | 0.005 |

---

*P* < 0.05 was considered statistically significant.

**Table S5. GSEA enrichment analysis at mRNA levels**

| <b>ID</b> | <b>Description</b>                       | <b>Set size</b> | <b>Enrichment score</b> | <b>NES</b> | <b>P-value</b> | <b>P.adjust</b> | <b>q-value</b> |
|-----------|------------------------------------------|-----------------|-------------------------|------------|----------------|-----------------|----------------|
| hsa05168  | Herpes simplex virus 1 infection         | 272             | -0.385                  | -1.897     | 0.000          | 0.000           | 0.000          |
| hsa05166  | Human T-cell leukemia virus 1 infection  | 133             | -0.400                  | -1.793     | 0.000          | 0.023           | 0.019          |
| hsa04380  | Osteoclast differentiation               | 67              | -0.465                  | -1.813     | 0.001          | 0.032           | 0.027          |
| hsa04064  | NF-kappa B signaling pathway             | 57              | -0.471                  | -1.804     | 0.001          | 0.043           | 0.036          |
| hsa04668  | TNF signaling pathway                    | 76              | -0.473                  | -1.921     | 0.000          | 0.020           | 0.017          |
| hsa05210  | Colorectal cancer                        | 63              | -0.475                  | -1.845     | 0.001          | 0.049           | 0.042          |
| hsa04625  | C-type lectin receptor signaling pathway | 65              | -0.487                  | -1.893     | 0.001          | 0.032           | 0.027          |
| hsa04630  | JAK-STAT signaling pathway               | 70              | -0.500                  | -1.979     | 0.000          | 0.020           | 0.017          |
| hsa04657  | IL-17 signaling pathway                  | 43              | -0.521                  | -1.892     | 0.001          | 0.032           | 0.027          |

*P* < 0.05 was considered statistically significant.

**Table S6. Antibodies used in experiments**

| <b>Antibodies</b>       | <b>Source</b>    | <b>Application</b> | <b>Identifier</b> |
|-------------------------|------------------|--------------------|-------------------|
| Anti-CD63               | CST              | WB                 | 52090S            |
| Anti-Alix               | CST              | WB                 | 92880             |
| Anti-TSG101             | CST              | WB                 | 72312             |
| Anti-GM130              | CST              | WB                 | 12480             |
| Anti-CD68               | Abcam            | IF                 | ab213363          |
| Anti-CD4                | CST              | IF                 | 93518S            |
| Anti-CD8 $\alpha$       | CST              | IF                 | 55397             |
| Anti- $\alpha$ -SMA     | CST              | IF                 | 19245             |
| Anti-Foxp3              | R&D              | IF                 | MAB8214           |
| Anti-iNOS               | Abcam            | IF                 | ab178945          |
| Anti-CD163              | Abcam            | IF                 | ab182422          |
| Anti-CD206              | CST              | IHC                | 24595             |
| Anti-ALKBH5             | Proteintech      | WB; IF; RIP        | 16837-1-AP        |
| Anti-GAPDH              | Proteintech      | WB                 | 60004-1-Ig        |
| Anti- Histone H3        | Abcam            | WB                 | ab1791            |
| Anti-p-JAK2             | Abcam            | WB; IHC            | ab32101           |
| Anti-JAK2               | Abcam            | WB                 | ab108596          |
| Anti-p-STAT5            | CST              | WB; IHC            | 9359              |
| Anti-STAT5              | CST              | WB                 | 94205             |
| Anti-SOCS2              | Sigma            | WB; IHC            | SAB5701688        |
| Anti-Ki67               | Abcam            | IHC                | ab16667           |
| Anti-METTL3             | Abcam            | RIP                | ab195352          |
| Anti-METTL14            | Proteintech      | RIP                | 26158-1-AP        |
| Anti-WTAP               | Abcam            | RIP                | ab195380          |
| Anti-FTO                | Proteintech      | RIP                | 27226-1-AP        |
| Anti-N6-Methyladenosine | Synaptic Systems | Dot Blot; RIP      | 202003            |

**Table S7. Primer Sequences**

| <b>Primer name</b>         | <b>Forward (5' - 3')</b> | <b>Reverse (5' - 3')</b> |
|----------------------------|--------------------------|--------------------------|
| <i>hsa_circ_0008253</i>    | ACTTCTTGCCTGCTCTCAGTT    | CTCTGGTCTCTCTTCTCGGG     |
| <i>hsa_circ_0004606</i>    | TGCAGAACTATGTCCTCACCC    | GGTACACCACATGTGTCCTC     |
| <i>hsa_circ_0017639</i>    | TTGGGATGAAGCTTGAGACA     | CTCGAACCAGTCAAGTCACG     |
| <i>hsa_circ_0003314</i>    | CCTCTTCTGCCTCGTCATGG     | CCACTTGCCAGGGAAAATGAT    |
| <i>hsa_circ_0077086</i>    | GCTTTAAGCTGCCAAAGTTCCT   | TTCAACACCTTGGAGCCGAC     |
| <i>hsa_circ_0040148</i>    | GTCTGAGTTGTCCTATGCCCC    | AGCAGGTTGCTGTCTTTCGG     |
| <i>hsa_circ_0042521</i>    | ATGAAGCTGTTTCATCTCCTTTGC | CTGGCTAGACAGGGTATAGAGT   |
| <i>hsa_circ_0034447</i>    | GAGCTGTCCAGCATGGTCTCT    | GTGGCCAATGTAGTAGTGCG     |
| <i>hsa_circ_0072758</i>    | CAGGTTGTTGCAGGAGACCAT    | AGAGAAAGCCTGACACAGGTC    |
| <i>hsa_circ_0002360</i>    | ACCACTCCACTGCCTTTAAACC   | GGGGCCCATCCACTGTGATT     |
| <i>hsa_circ_0054241</i>    | ATGGGACTGGCAGAAGAAAGC    | CACGCTCAAAAAGTGCCAAGT    |
| <i>hsa_circ_0003528</i>    | GGTTCCTTTTTCTTTGCGGCT    | TGCTGACCAGAACAGTCCAAG    |
| <i>circEML4</i>            | AACACAGGCTGGAATGGACC     | CGCTCAAAAAGTGCCAAGTCC    |
| <i>circEML4 convergent</i> | TGTGGGATTCTGTTACTCTA     | TATGACCTCTGCTCCTTTT      |
| <i>GAPDH</i>               | CAATGACCCCTTCATTGACC     | TTGATTTTGGAGGGATCTCG     |
| <i>GAPDH divergent</i>     | TCAAGAAGGTGGTGAAGCAGGC   | ATGCCAGTGAGCTTCCCCTT     |
| <i>EML4</i>                | GACATTGATTGGACGACAT      | TGTACTTGTGACTGGGAGC      |
| <i>SOCS2</i>               | TGCAAGGATAAGCGGACAGG     | CAGAGATGGTGTGACTGCTGT    |
| <i>CCL-22</i>              | AAACTAATGTCCCTCCCTCTC    | TTTGGGGCTTACATTGACC      |
| <i>TGF-β</i>               | CAACAATTCCTGGCGATACC     | GAACCCGTTGATGTCCACTT     |

**Table S8. Sequences of siRNAs**

| <b>Name</b>             | <b>Sequence</b>     |
|-------------------------|---------------------|
| <i>circEML4 siRNA-1</i> | ACGCACTCAGGCAGCCTCT |
| <i>circEML4 siRNA-2</i> | CACTCAGGCAGCCTCTACA |
| <i>circEML4 siRNA-3</i> | TCAGGCAGCCTCTACAACC |
| <i>ALKBH5 siRNA-1</i>   | GATCGCCTGTCAGGAAACA |
| <i>ALKBH5 siRNA-2</i>   | GTCCTTCTTTAGCGACTCT |
| <i>ALKBH5 siRNA-3</i>   | GCTGCAAGTTCAGTTCAA  |

**Table S9. Sequences for FISH**

| <b>Name</b>                         | <b>Sequence</b>            |
|-------------------------------------|----------------------------|
| <i>5-FAM-labeled circEML4_probe</i> | TAGAGGC+TGCTGAGTGCGT+TCCTA |
| <i>Cy3-labeled circEML4_probe</i>   | GT+TGTAGAGGCTGCC+TGAGTGCGT |

**Table S10. Sequences for RNA pull-down assay**

| <b>Name</b>             | <b>Sequence</b>                  |
|-------------------------|----------------------------------|
| <i>circEML4_probe-1</i> | TGGGGTTGTAGAGGCTGCCTGAGTG-/3bio/ |
| <i>circEML4_probe-2</i> | TGTAGAGGCTGCCTGAGTGCGTTCC-/3bio/ |
| <i>NC probe</i>         | AAGTGCTGGTGTGCGGGGTGTT-/3bio/    |
